# Supplementary material
Source: ML conference proceedings conference paper supplement (https://openaccess.thecvf.com/content/ICCV_2019/html/Sinha_Variational_Adversarial_Active_ICCV_2019_paper.html)
Supplement: Supplementary file 1 [file Sinha_Variational_Adversarial_Active_ICCV_2019_supplemental.pdf]

## SUPPLEMENTARY MATERIAL

### A. Datasets

Table 2 shows a summary of the datasets utilized in our work along with their size and number of classes and budget size.

| Dataset          | #Classes | Train + Val      | Test  | Initially Labeled | Budget | Image Size       |
|------------------|----------|------------------|-------|-------------------|--------|------------------|
| CIFAR10 [29]     | 10       | 45000 + 5000     | 10000 | 5000              | 2500   | $32 \times 32$   |
| CIFAR100 [29]    | 100      | 45000 + 5000     | 10000 | 5000              | 2500   | $32 \times 32$   |
| Caltech-256 [22] | 256      | 27607 + 3000     | 2560  | 3060              | 1530   | $224 \times 224$ |
| ImageNet [6]     | 1000     | 1153047 + 128120 | 50000 | 128120            | 64060  | $224 \times 224$ |
| BDD100K [57]     | 19       | 7000 + 1000      | 2000  | 800               | 400    | $688 \times 688$ |
| Cityscapes [5]   | 19       | 2675 + 300       | 500   | 300               | 150    | $688 \times 688$ |

Table 2. A summary of the datasets used in our experiments. CIFAR10, CIFAR100, Caltech-256 and ImageNet are datasets used for image classification, while BDD100K and Cityscapes are large scale segmentation datasets. The budget for each dataset is the number of images that can be sampled at each training iteration.

### B. Hyperparameter Selection

Table 3 shows the hyperparameters found for our models through a grid search.

| Experiment  | $d$ | $\alpha_1$         | $\alpha_2$         | $\alpha_3$         | $\lambda_1$ | $\lambda_2$ | $\beta$ | batch size | epochs |
|-------------|-----|--------------------|--------------------|--------------------|-------------|-------------|---------|------------|--------|
| CIFAR10     | 32  | $5 \times 10^{-4}$ | $5 \times 10^{-4}$ | $5 \times 10^{-4}$ | 1           | 1           | 1       | 64         | 100    |
| CIFAR100    | 32  | $5 \times 10^{-4}$ | $5 \times 10^{-4}$ | $5 \times 10^{-4}$ | 1           | 1           | 1       | 64         | 100    |
| Caltech-256 | 64  | $5 \times 10^{-4}$ | $5 \times 10^{-4}$ | $5 \times 10^{-4}$ | 1           | 10          | 1       | 64         | 100    |
| ImageNet    | 64  | $10^{-1}$          | $10^{-3}$          | $10^{-3}$          | 1           | 10          | 1       | 64         | 100    |
| BDD100K     | 128 | $10^{-3}$          | $10^{-3}$          | $10^{-3}$          | 1           | 25          | 1       | 8          | 100    |
| Cityscapes  | 128 | $10^{-3}$          | $10^{-3}$          | $10^{-3}$          | 1           | 25          | 1       | 8          | 100    |

Table 3. Hyperparameters used in our experiments for VAAL.  $d$  is the latent space dimension of VAE.  $\alpha_1$ ,  $\alpha_2$ , and  $\alpha_3$  are learning rates for VAE, discriminator ( $D$ ), and task module ( $T$ ), respectively.  $\lambda_1$  and  $\lambda_2$  are the regularization parameters for transductive and adversarial terms used in Eq. (4).  $\beta$  is the Lagrangian parameter in Eq. (1).

Figure 6 shows the performance of our method is robust to the choice of the architecture by having consistently better performance over Core-set [43] on CIFAR100.

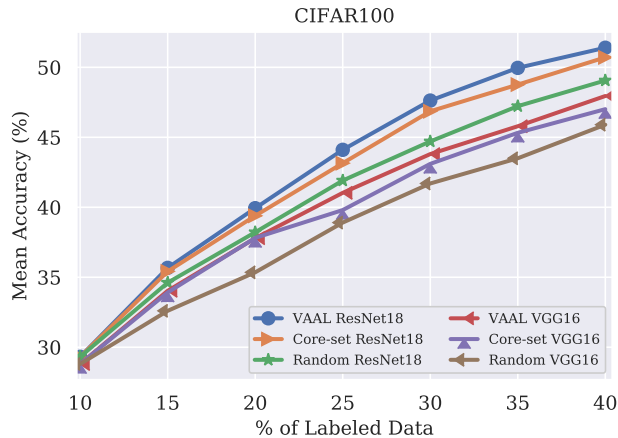

Figure 6. Performance of VAAL using ResNet18 and VGG16 on CIFAR100
